# Supplementary material for: Motion of variable-length MreB filaments at the bacterial cell membrane influences cell morphology
Source: PubMed Central journal article supplement — Mol Biol Cell. 2013 Aug 1;24(15):2340–9. doi: 10.1091/mbc.E12-10-0728 (PMC3727927; doi:10.1091/mbc.e12-10-0728), 2013-08-01
Supplement: supp_E12-10-0728v1_CombinedSupMats.pdf [file supp_E12-10-0728v1_CombinedSupMats.pdf]

# Supplemental Materials

*Molecular Biology of the Cell*

Reimold et al.

Suppl. Fig. 1

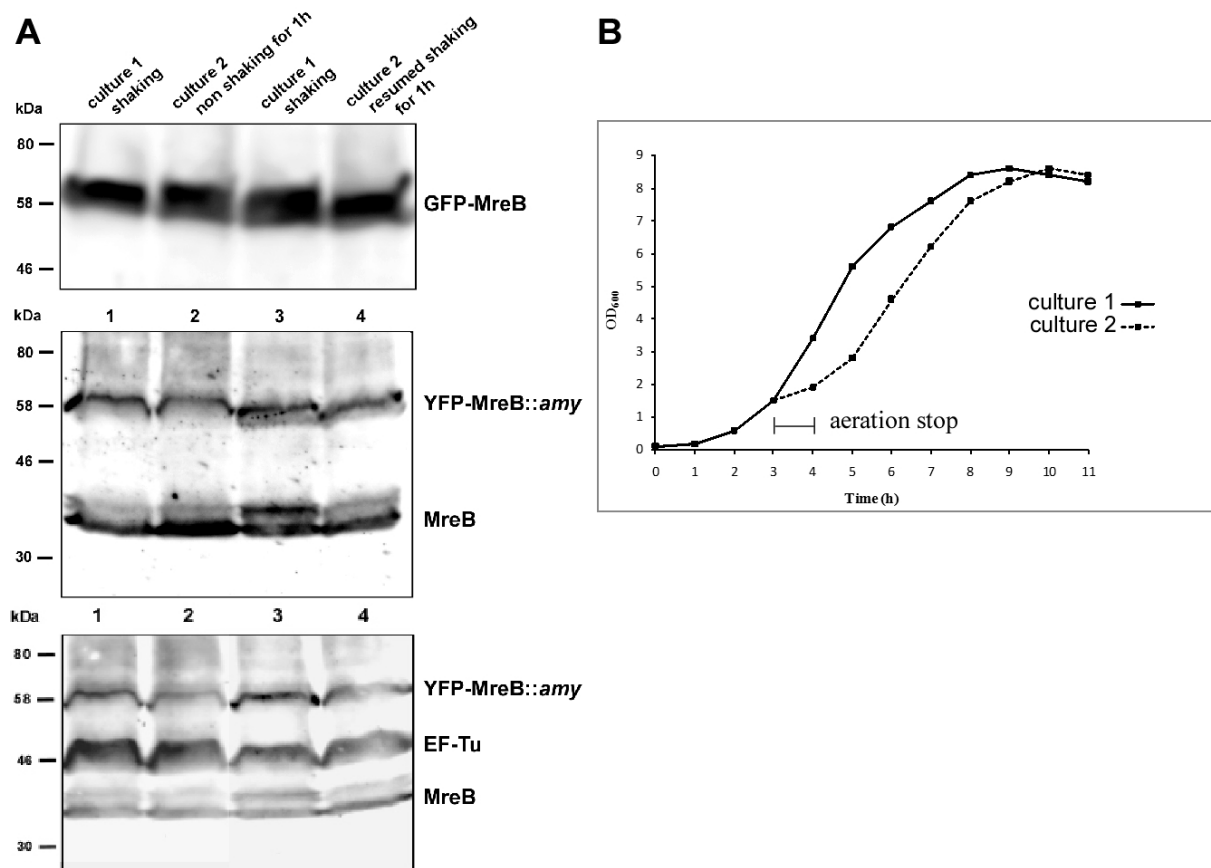

A) Western Blot analysis: *B. subtilis* cells expressing GFP-MreB from the original gene locus as sole copy of MreB (upper panel), or YFP-MreB from an ectopic site (middle and lower panels), using anti MreB serum and additionally anti EF-Tu serum (lower panel) as a loading control. Cells were grown at 30°C until early exponential phase and were split into two cultures. One fraction remained constantly shaking, while the other fraction was incubated without shaking. After one hour, when YFP-MreB filaments from the non-shaking culture were fragmented into short filaments or spotty structures, equal amounts of cells were harvested from both cultures (lane 1: culture 1 (shaking); lane 2: culture 1 (non shaking for 1h)). Subsequently, both cultures were incubated for one more hour under shaking condition and second fractions with equal amounts of cells were harvested (lane 3: culture 2 (shaking); lane 4: culture 1 (resumed shaking for 1h)). Proteins were separated by SDS PAGE and transferred to a nitrocellulose membrane via Western blotting. MreB was visualized by chemiluminescence using a primary rabbit-anti-MreB-IgG and a secondary goat-anti-rabbit-IgG, fused to horseradish peroxidase. The nature of the different fusions is indicated on the right. YFP-MreB expressed from the amylase locus showed lowered concentration under non-shaking conditions in some experiments, and no change in other independent experiments, therefore both cases are shown.

B) Growth curves of YFP-MreB expressing *B. subtilis* cells grown at 37°C under different aeration conditions. The initial culture was grown until early exponential phase (OD<sub>600</sub> of 1.5) and concomitantly split into two cultures. Culture 1 (solid line) remained shaking, whereas culture 2 (dashed line) was incubated without shaking for 1 hour and subsequently resumed growth under shaking condition.

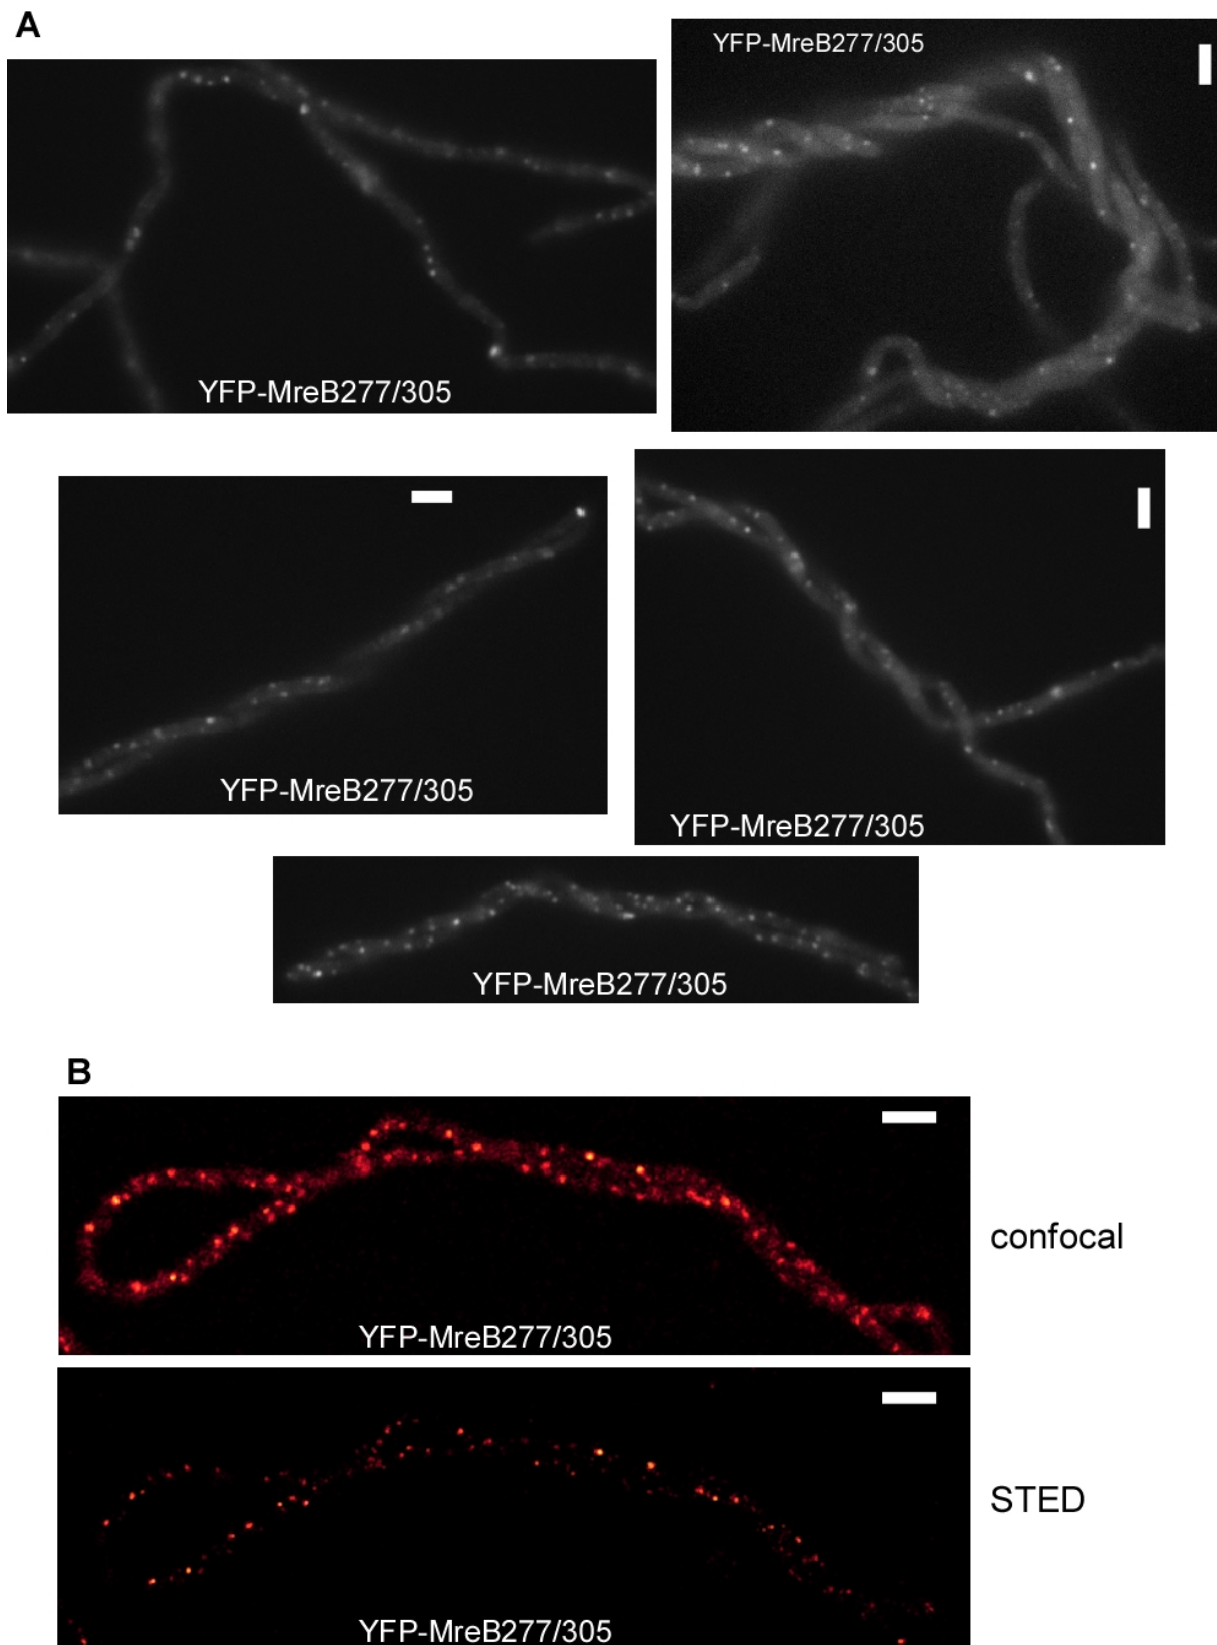

Suppl. Fig. 2 A) Epifluorescence microscopy of *B. subtilis* cells expressing xylose-inducible YFP-MreB277/305 from an ectopic locus for 8 hours. 20 to 40% show irregular cell shape (upper left panel), the remaining cells double or triple coiled super structures. B) confocal (upper panel) and STED images (lower panel) of YFP-MreB277/305 expressing cells. White bars 2  $\mu\text{m}$ .

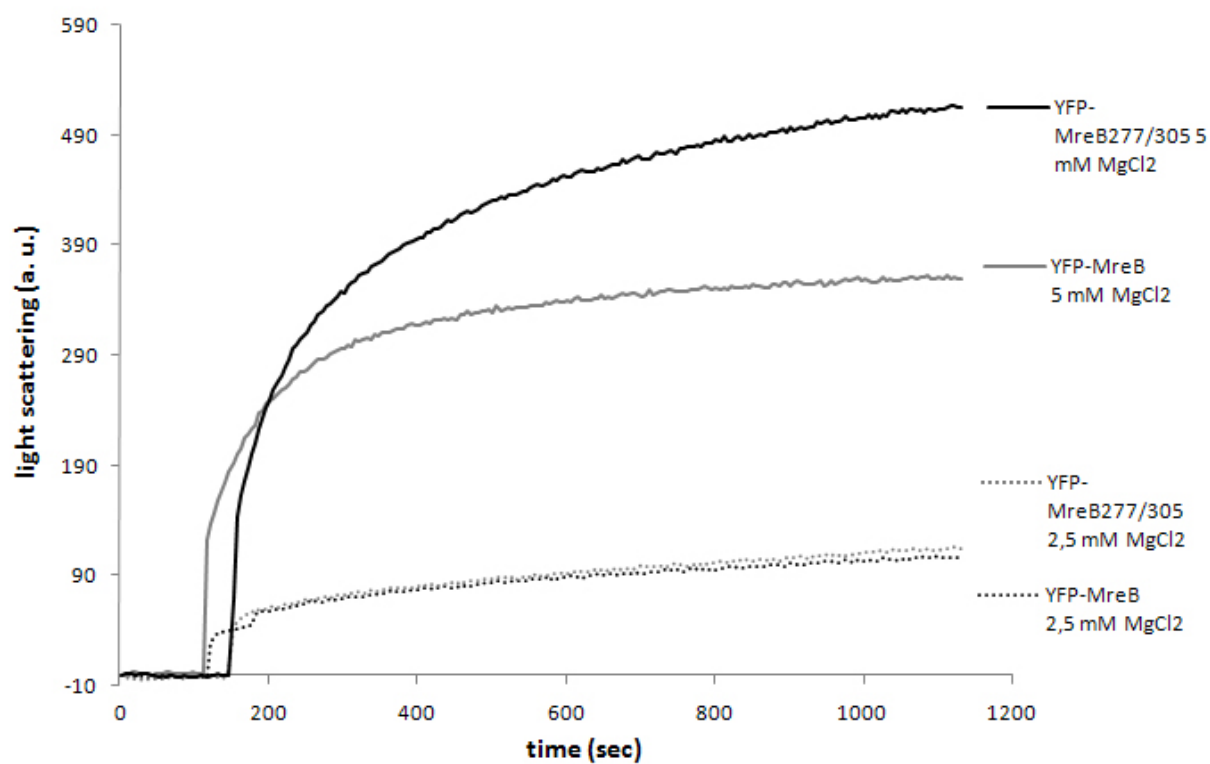

Suppl. Fig. 3: Light scattering analysis of filament formation of YFP-MreB and of YFP-MreB277/305. Proteins were purified in the presence of ATP, and filament formation was induced by the addition of magnesium.

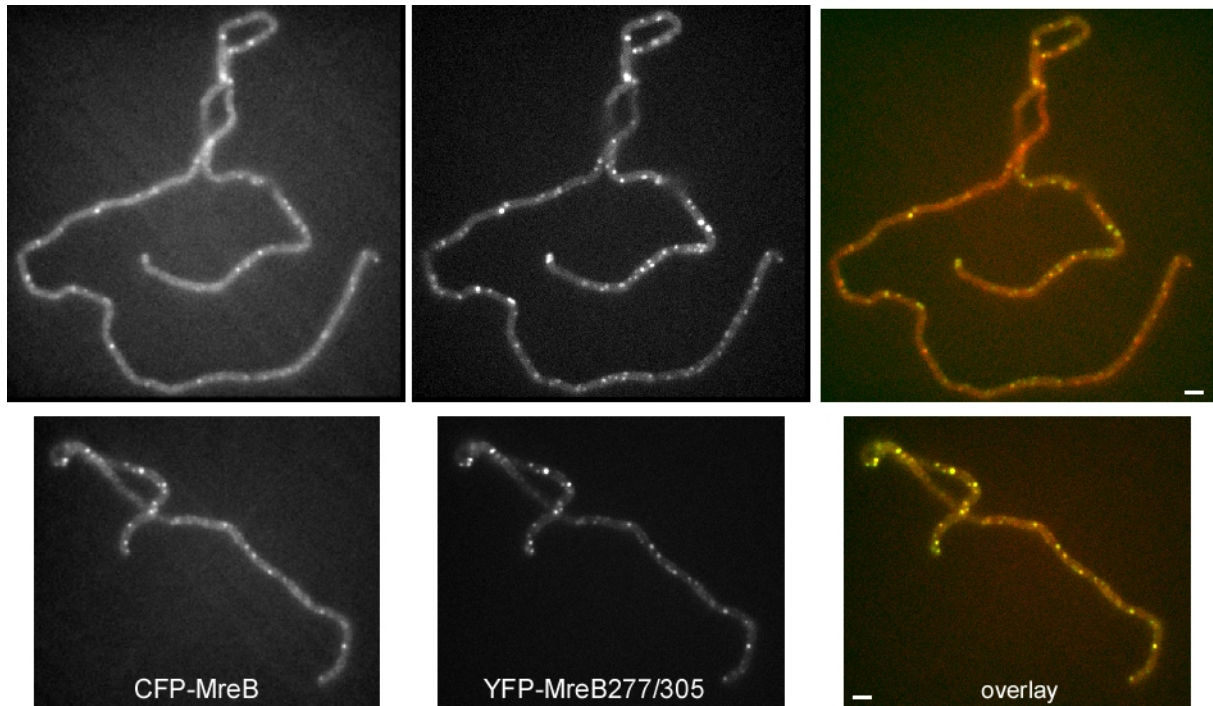

Suppl. Fig. 4: Epifluorescence microscopy of *B. subtilis* cells expressing CFP-MreB from the threonine locus (IPTG induction, red in the overlay) and YFP-MreB277/305 from the amylose locus (xylose induction, green in the overlay) for 6 hours. White bars 2  $\mu$ m.

## Supplementary movies:

Note that the size of the movie player may have to be adjusted (reduced or enlarged) to properly see the filamentous structures (especially for the *E. coli* movies)

Movie 1: *B. subtilis* cells expressing YFP-MreB, Z-stack acquired by SIM (Zeiss), step size 150 nm, going from top to bottom, shown are 6 frames/s.

Movie 2: *B. subtilis* cells expressing YFP-MreB, time lapse N-SIM acquisition (exposure time 1.2 s, 3D SIM, 5 s intervals), 6 frames/s

Movie 3: same field as in movie 2 and same experimental setups, movie acquired 5 min later than movie 2.

Movie 4: *B. subtilis* cells expressing YFP-MreB, time lapse N-SIM acquisition (exposure time 1.2 s, 3D SIM, 5 s intervals), 6 frames/s

Movie 5: *B. subtilis* cells expressing YFP-MreB, 1 h after arrest of aeration, time lapse epifluorescence acquisition, 5 s intervals, 6 frames/s

Movie 6: *E. coli* cells expressing MreB-RFP<sup>sw</sup>. Time lapse SIM (Zeiss) acquisition (exposure time 1 s, 2D SIM, 5 s intervals), 6 frames/s (note that the size of the movie must be adjusted to properly see the filamentous structures).

Movie 7: *E. coli* cells expressing MreB-RFP<sup>sw</sup>. Time lapse SIM (Zeiss) acquisition (exposure time 1 s, 2D SIM, 5 s intervals), 6 frames/s.

Movie 8: *B. subtilis* cells expressing YFP-MreBD158A, time lapse SIM (Zeiss) acquisition (exposure time 0.5 s, 2D SIM, 5 s intervals), 6 frames/s

Movie 9: *B. subtilis* cells expressing YFP-MreBD158A, time lapse SIM (Zeiss) acquisition (exposure time 0.5 s, 2D SIM, 5 s intervals), 6 frames/s

Movie 10: *B. subtilis* cells expressing YFP-MreB277/305, Z-stack acquired by SIM (Zeiss), step size 150 nm, going from top to bottom, shown are 3 frames/s.

Movie 11: *B. subtilis* cells expressing YFP-MreB277/305 for 2 hours, time lapse acquisition by SIM (Zeiss), (exposure time 0.5 s, 2D SIM, 5 s intervals), 6 frames/s

Movie 12: *B. subtilis* cells expressing YFP-MreB277/305 for 4 hours, time lapse acquisition by epifluorescence, 5 s intervals, 6 frames/s

**Suppl. table 1. Oligonucleotides**

| Name | Sequence                                          | Restrictionsite |
|------|---------------------------------------------------|-----------------|
| 2390 | ACTAGATCTGCATTTAAGAGGAGGAGAAG                     | <i>Bgl</i> II   |
| 2391 | ACTGGTACCCATCTATTTATATCCTCCTTG                    | <i>Kpn</i> I    |
| 2515 | GTCATCAGCGAAGAAACAGACATGCCGGTCCTTATCGC            |                 |
| 2516 | GCGATAAGGACCGGCATGTCTGTTTCTTCGCTGATGAC            |                 |
| 2563 | CCGCCTGAGCTTGCACAAGATATCATGGACAGAGG               |                 |
| 2564 | CCTCTGTCCATGATATCTTGTGCAAGCTCAGGCGG               |                 |
| 2616 | ACTGCATGCTTATCTAGTTTTCCCTTTGAAA                   | <i>Sph</i> I    |
| 2861 | ACTGCTAGCAAGGAGATTCTAGGATGTTGGATTCAATAGAAAAGGTAAG | <i>Nhe</i> I    |
| 2962 | ACTGCTAGCAAGGAGATTCTAGGATGTTGGAATTGGTGCTAG        | <i>Nhe</i> I    |

**Suppl. table 2. Plasmids**

| Name   | Genotype*                                                                                                                                                         | Reference                          |
|--------|-------------------------------------------------------------------------------------------------------------------------------------------------------------------|------------------------------------|
| pDP150 | ( <i>P<sub>hyperspank</sub></i> , <i>lacI</i> :: <i>thrC</i> ( <i>bla</i> <sup>r</sup> , <i>mls</i> <sup>r</sup> , <i>spc</i> <sup>r</sup> )                      | (Kearns and Losick, 2005)          |
| pJS13  | <i>P<sub>xyI</sub></i> - <i>gfp-mbl</i> ( <i>bla</i> <sup>r</sup> , <i>cm</i> <sup>r</sup> )                                                                      | (Defeu Soufo and Graumann, 2004)   |
| pJS152 | <i>P<sub>mbl</sub></i> - <i>gfp-mbl</i> ( <i>bla</i> <sup>r</sup> , <i>cm</i> <sup>r</sup> )                                                                      | this work                          |
| pJS24  | <i>P<sub>xyI</sub></i> - <i>yfp-mreB::amyE</i> ( <i>bla</i> <sup>r</sup> , <i>spc</i> <sup>r</sup> )                                                              | (Defeu Soufo and Graumann, 2006)   |
| pJS64  | <i>P<sub>hyperspank</sub></i> - <i>strep-yfp-mreB</i> ( <i>sm</i> <sup>r</sup> )                                                                                  | (Defeu Soufo <i>et al.</i> , 2010) |
| pCR4   | <i>P<sub>xyI</sub></i> - <i>yfp-mreB277/305::amyE</i> ( <i>bla</i> <sup>r</sup> , <i>spc</i> <sup>r</sup> )                                                       | this work                          |
| pCR5   | <i>P<sub>hyperspank</sub></i> - <i>strep-yfp-mreB277/305</i> ( <i>sm</i> <sup>r</sup> )                                                                           | this work                          |
| pCR6   | ( <i>P<sub>hyperspank</sub></i> - <i>mreB277/305</i> , <i>lacI</i> :: <i>thrC</i> ( <i>bla</i> <sup>r</sup> , <i>mls</i> <sup>r</sup> , <i>spc</i> <sup>r</sup> ) | this work                          |
| pCR7   | ( <i>P<sub>hyperspank</sub></i> - <i>mCer-mreB</i> , <i>lacI</i> :: <i>thrC</i> ( <i>bla</i> <sup>r</sup> , <i>mls</i> <sup>r</sup> , <i>spc</i> <sup>r</sup> )   | this work                          |

\* Resistance (<sup>r</sup>) gene abbreviations: *bla*, ampicillin, *cm*, chloramphenicol, *spc*, spectinomycin, *mls*, macrolide-lincosamide-streptogramin, *sm*, streptomycin.

## References

- Defeu Soufo, H.J., and Graumann, P.L. (2004) Dynamic movement of actin-like proteins within bacterial cells. *EMBO Rep.* **5**: 789-794.
- Defeu Soufo, H.J., and Graumann, P.L. (2006) Dynamic localization and interaction with other *Bacillus subtilis* actin-like proteins are important for the function of MreB. *Mol. Microbiol.* **62**: 1340-1356.
- Defeu Soufo, H.J., and Graumann, P.L. (2010) *Bacillus subtilis* MreB paralogues have different filament architectures and lead to shape remodelling of a heterologous cell system. *Mol. Microbiol.* **78**: 1145-1158.
- Kearns, D.B., and Losick, R. (2005) Cell population heterogeneity during growth of *Bacillus subtilis*. *Genes Dev.* **19**: 3083-3094.
- Lewis, P.J., and Marston, A.L. (1999) GFP vectors for controlled expression and dual labelling of protein fusions in *Bacillus subtilis*. *Gene* **227**: 101-110.
